# Supplementary material for: The distribution of sport performance gene variations through COVID-19 disease severity
Source: Research Square preprint supplement (doi:10.21203/rs.3.rs-5674989/v1), 2024-12-24
Supplement: Supplementary file 1 [file f6a06c750f1a0862507656a9.docx]

SUPPLEMENTARY FILES

**The distribution of sport performance gene variations through COVID-19 disease severity**

GuvenYenmis1*, Ilayda Kallenci2, Mehmet Dokur3, Suna Koc4, Sila Basak Yalinkilic2, Evren Atak5, Mahmut Demirbilek6, Hulya Arkan7

1Department of Medical Biology, Tayfur Ata Sokmen School of Medicine, Hatay Mustafa Kemal University, Hatay, Turkey

2Department of Molecular Biologyand Genetics, Faculty of Natural Sciences and Engineering, Biruni University, Istanbul, Turkey

3Department of Emergency Medicine, Faculty of Medicine, Bilecik Seyh Edebali University, Bilecik, Turkey

4Department of Anesthesia and Reanimation, School of Medicine, Biruni University, Istanbul, Turkey

5Department of Bioinformatics and System Biology, Institute of Natural and Applied Sciences, Gebze Technical University, Kocaeli, Turkey

6Department of Emergency Medicine, Bilecik Seyh Edebali University Faculty of Medicine, Bilecik, Turkey

7Department of Biotechnology, Institute of Science, Yildiz Technical University, Istanbul, Turkey

* **Corresponding Author:** Assistant Prof.Dr. Guven Yenmis PhD.

**E-mail:** guven.yenmis@yahoo.com

**Table S1** The genotype-allele distribution of ACE1 rs4646994 polymorphism and the disease severity in male participants

| **ACE1**  ***rs4646994*** | **Male** | | | | | | | |
| --- | --- | --- | --- | --- | --- | --- | --- | --- |
| ***Control*** | ***Patients*** | | | ***p-value (OR)*** | | | |
| **Genotypes** | **Asymp**  **n** | **Overall**  **n** | **Mild**  **n** | **Severe**  **n** | **Asymp vs Overall** | **Asymp vs Mild** | **Asymp vs Severe** | **Mild vs Severe** |
| Ins/Ins (II) | 3 | 29 | 22 | 7 | Ref | Ref | Ref | Ref |
| Ins/Del (ID) | 11 | 84 | 64 | 20 | 1.0000b (0.790) | 1.0000b (0.793) | 1.0000b (0.779) | 0.9715a (0.982) |
| Del/Del (DD) | 8 | 80 | 65 | 15 | 1.0000b (1.034) | 1.0000b (1.108) | 1.0000b (0.804) | 0.5357a (0.725) |
| Dominant Model  (II+ID vs DD) | 14 | 113 | 86 | 27 | Ref | Ref | Ref | Ref |
| 8 | 80 | 65 | 15 | 0.6457a (1.239) | 0.5532a (1.323) | 0.9590a (0.972) | 0.3936a (0.735) |
| Recessive Model  (II vs ID+DD) | 3 | 29 | 22 | 7 | Ref | Ref | Ref | Ref |
| 19 | 164 | 129 | 35 | 1.0000b (0.893) | 1.0000b (0.926) | 1.0000b (0.790) | 0.7365a (0.853) |
| Ins | 17 | 142 | 108 | 34 | Ref | Ref | Ref | Ref |
| Del | 27 | 244 | 194 | 50 | 0.8098a (1.082) | 0.7107a (1.131) | 0.8400a (0.926) | 0.4280a (0.819) |

OR, odds ratio; Ref, reference; aChi-square test or bFisher's exact test were used for analysis.

**Table S2** The genotype-allele distribution of ACE1 rs4646994 polymorphism and the disease severity in female participants

| **ACE1**  ***rs4646994*** | **Female** | | | | | | | |
| --- | --- | --- | --- | --- | --- | --- | --- | --- |
| ***Control*** | ***Patients*** | | | ***p-value (OR)*** | | | |
| **Genotypes** | **Asymp**  **n** | **Overall**  **n** | **Mild**  **n** | **Severe**  **n** | **Asymp vs Overall** | **Asymp vs Mild** | **Asymp vs Severe** | **Mild vs Severe** |
| Ins/Ins (II) | 5 | 34 | 26 | 8 | Ref | Ref | Ref | Ref |
| Ins/Del (ID) | 14 | 78 | 58 | 20 | 0.7217a (0.819) | 0.6907a (0.797) | 0.8653a (0.893) | 0.8124a (1.121) |
| Del/Del (DD) | 9 | 72 | 65 | 7 | 0.7692b (1.176) | 0.5488b (1.389) | 0.3404a (0.486) | 0.0747b (0.350) |
| Dominant Model  (II+ID vs DD) | 19 | 112 | 84 | 28 | Ref | Ref | Ref | Ref |
| 9 | 72 | 65 | 7 | 0.4784a (1.357) | 0.2584a (1.634) | 0.2712a (0.528) | **0.0100**a (0.323) |
| Recessive Model  (II vs ID+DD) | 5 | 34 | 26 | 8 | Ref | Ref | Ref | Ref |
| 23 | 150 | 123 | 27 | 0.9370a (0.959) | 1.0000b (1.028) | 0.6260a (0.734) | 0.4583a (0.713) |
| Ins | 24 | 146 | 110 | 36 | Ref | Ref | Ref | Ref |
| Del | 32 | 222 | 188 | 34 | 0.6507a (1.140) | 0.4001a (1.282) | 0.3384a (0.708) | **0.0255**a (0.553) |

OR, odds ratio; Ref, reference; aChi-square test or bFisher's exact test were used for analysis. p<0.05 values were shown in bold

**Table S3** The genotype-allele distribution of PPARGC1A rs8192678 polymorphism and the disease severity in female participants

| **PPARGC1A *rs8192678*** | **Female** | | | | | | | |
| --- | --- | --- | --- | --- | --- | --- | --- | --- |
| ***Control*** | ***Patients*** | | | ***p-value (OR)*** | | | |
| **Genotypes** | **Asymp**  **n** | **Overall**  **n** | **Mild**  **n** | **Severe**  **n** | **Asymp vs Overall** | **Asymp vs Mild** | **Asymp vs Severe** | **Mild vs Severe** |
| CC | 15 | 45 | 36 | 9 | Ref | **Ref** | **Ref** | Ref |
| TC | 8 | 111 | 91 | 20 | **0.0006**a (4.625) | **0.0006**a (4.740) | **0.0141**a (4.167) | 0.7731a (0.879) |
| TT | 5 | 28 | 22 | 6 | 0.2687a (1.867) | 0.2945a (1.833) | 0.4674b (2.000) | 0.8832a (1.091) |
| Dominant Model  (CC+TC vs TT) | 23 | 156 | 127 | 29 | Ref | Ref | Ref | Ref |
| 5 | 28 | 22 | 6 | 0.7794b (0.826) | 0.7741b (0.797) | 1.0000b (0.952) | 0.7245a (1.194) |
| Recessive Model  (CC vs TC+TT) | 15 | 45 | 36 | 9 | Ref | Ref | Ref | Ref |
| 13 | 139 | 113 | 26 | **0.0014**a (3.564) | **0.0016**a (3.622) | **0.0237**a(3.333) | 0.8474a (0.920) |
| C allele | 38 | 201 | 163 | 38 | Ref | Ref | Ref | Ref |
| T allele | 18 | 167 | 135 | 32 | 0.0628a (1.754) | 0.0682a (1.748) | 0.1218a (1.778) | 0.9503a (1.017) |

OR, odds ratio; Ref, reference; aChi-square test or bFisher's exact test were used for analysis. p<0.05 values were shown in bold

**Table S4** The genotype-allele distribution of PPARGC1A rs8192678 polymorphism and the disease severity in male participants

| **PPARGC1A *rs8192678*** | **Male** | | | | | | | |
| --- | --- | --- | --- | --- | --- | --- | --- | --- |
| ***Control*** | ***Patients*** | | | ***p-value (OR)*** | | | |
| **Genotypes** | **Asymp**  **n** | **Overall**  **n** | **Mild**  **n** | **Severe**  **n** | **Asymp vs Overall** | **Asymp vs Mild** | **Asymp vs Severe** | **Mild vs Severe** |
| CC | 10 | 48 | 36 | 12 | Ref | **Ref** | **Ref** | Ref |
| TC | 7 | 119 | 92 | 27 | **0.0110**a (3.542) | **0.0106**a (3.651) | **0.0481**a (3.214) | 0.7494a (0.880) |
| TT | 5 | 26 | 23 | 3 | 0.8938b (1.083) | 0.6870a (1.278) | 0.6817b (0.500) | 0.1691a (0.391) |
| Dominant Model  (CC+TC vs TT) | 17 | 167 | 128 | 39 | Ref | Ref | Ref | Ref |
| 5 | 26 | 23 | 3 | 0.3310b (0.529) | 0.3613b (0.611) | 0.1112b (0.262) | 0.1744a (0.428) |
| Recessive Model  (CC vs TC+TT) | 10 | 48 | 36 | 12 | Ref | Ref | Ref | Ref |
| 12 | 145 | 115 | 30 | **0.0393**a (2.517) | **0.0321**a (2.662) | 0.1768a (2.083) | 0.5305a (0.783) |
| C allele | 27 | 215 | 164 | 51 | Ref | Ref | Ref | Ref |
| T allele | 17 | 171 | 138 | 33 | 0.4730a (1.263) | 0.3790a (1.336) | 0.9430a (1.028) | 0.2955a (0.769) |

OR, odds ratio; Ref, reference; aChi-square test or bFisher's exact test were used for analysis. p<0.05 values were shown in bold

**Table S5** The genotype-allele distribution of ACTN3 rs1815739 polymorphism and the disease severity in female participants

| **ACTN3 *rs1815739*** | **Female** | | | | | | | |
| --- | --- | --- | --- | --- | --- | --- | --- | --- |
| ***Control*** | ***Patients*** | | | ***p-value (OR)*** | | | |
| **Genotypes** | **Asymp**  **n** | **Overall**  **n** | **Mild**  **n** | **Severe**  **n** | **Asymp vs Overall** | **Asymp vs Mild** | **Asymp vs Severe** | **Mild vs Severe** |
| CC | 0 | 3 | 3 | 0 | Ref | Ref | Ref | Ref |
| TC | 6 | 129 | 120 | 9 | 1.0000b (2.846) | 1.0000b (2.648) | - | 1.0000b (0.552) |
| TT | 22 | 52 | 26 | 26 | 0.5534b (0.333) | 0.2494b (0.168) | - | 0.2384b (7.000) |
| Dominant Model  (CC+TC vs TT) | 6 | 132 | 123 | 9 | Ref | Ref | Ref | Ref |
| 22 | 52 | 26 | 26 | **<0.0001**a (0.107) | **<0.0001**a (0.058) | 0.6915a (0.788) | **<0.0001**a (13.67) |
| Recessive Model  CC vs TC+TT) | 0 | 3 | 3 | 0 | Ref | Ref | Ref | Ref |
| 28 | 181 | 146 | 35 | 1.0000b (0.910) | 1.0000b (0.734) | - | 1.0000b (1.696) |
| C allele | 6 | 135 | 126 | 9 | Ref | Ref | Ref | Ref |
| T allele | 50 | 233 | 172 | 61 | **0.0001**a (0.207) | **<0.0001**a (0.164) | 0.7121a (0.813) | **<0.0001**a (4.965) |

OR, odds ratio; Ref, reference; aChi-square test or bFisher's exact test were used for analysis. p<0.05 values were shown in bold

**Table S6** The genotype-allele distribution of ACTN3 rs1815739 polymorphism and the disease severity in male participants

| **ACTN3 *rs1815739*** | **Male** | | | | | | | |
| --- | --- | --- | --- | --- | --- | --- | --- | --- |
| ***Control*** | ***Patients*** | | | ***p-value (OR)*** | | | |
| **Genotypes** | **Asymp**  **n** | **Overall**  **n** | **Mild**  **n** | **Severe**  **n** | **Asymp vs Overall** | **Asymp vs Mild** | **Asymp vs Severe** | **Mild vs Severe** |
| CC | 0 | 2 | 2 | 0 | Ref | Ref | Ref | Ref |
| TC | 5 | 131 | 121 | 10 | 1.0000 (4.782) | 1.0000b (4.418) | - | 1.0000b (0.432) |
| TT | 17 | 60 | 28 | 32 | 1.0000b (0.691) | 0.5282b (0.326) | - | 0.2300b (5.702) |
| Dominant Model  (CC+TC vs TT) | 5 | 133 | 123 | 10 | Ref | Ref | Ref | Ref |
| 17 | 60 | 28 | 32 | **<0.0001**a (0.133) | **<0.0001**a (0.067) | 0.9227a (0.941) | **<0.0001**a (14.06) |
| Recessive Model  CC vs TC+TT) | 0 | 2 | 2 | 0 | Ref | Ref | Ref | Ref |
| 22 | 191 | 149 | 42 | 1.0000b (1.702) | 1.0000b (1.329) | - | 1.0000b (1.421) |
| C allele | 5 | 135 | 125 | 10 | Ref | Ref | Ref | Ref |
| T allele | 39 | 251 | 177 | 74 | **0.0015**a (0.238) | **0.0001**a (0.182) | 0.9280a (0.949) | **<0.0001**a (5.226) |

OR, odds ratio; Ref, reference; aChi-square test or bFisher's exact test were used for analysis. p<0.05 values were shown in bold
